# Supplementary material
Source: PubMed Central journal article supplement (PMC4198359)
Supplement: auto-10-1738-s01.pdf [file auto-10-1738-s01.pdf]

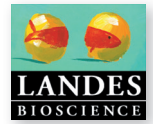

## **Supplemental Material to:**

**Bin Guo, Jie Huang, Wenxian Wu, Du Feng, Xiaochen Wang,  
Yingyu Chen, and Hong Zhang**

**The nascent polypeptide-associated complex is essential  
for autophagic flux**

**Autophagy 2014; 10(10)**

**<http://dx.doi.org/10.4161/auto.29638>**

**[www.landesbioscience.com/journals/autophagy/article/29638](http://www.landesbioscience.com/journals/autophagy/article/29638)**

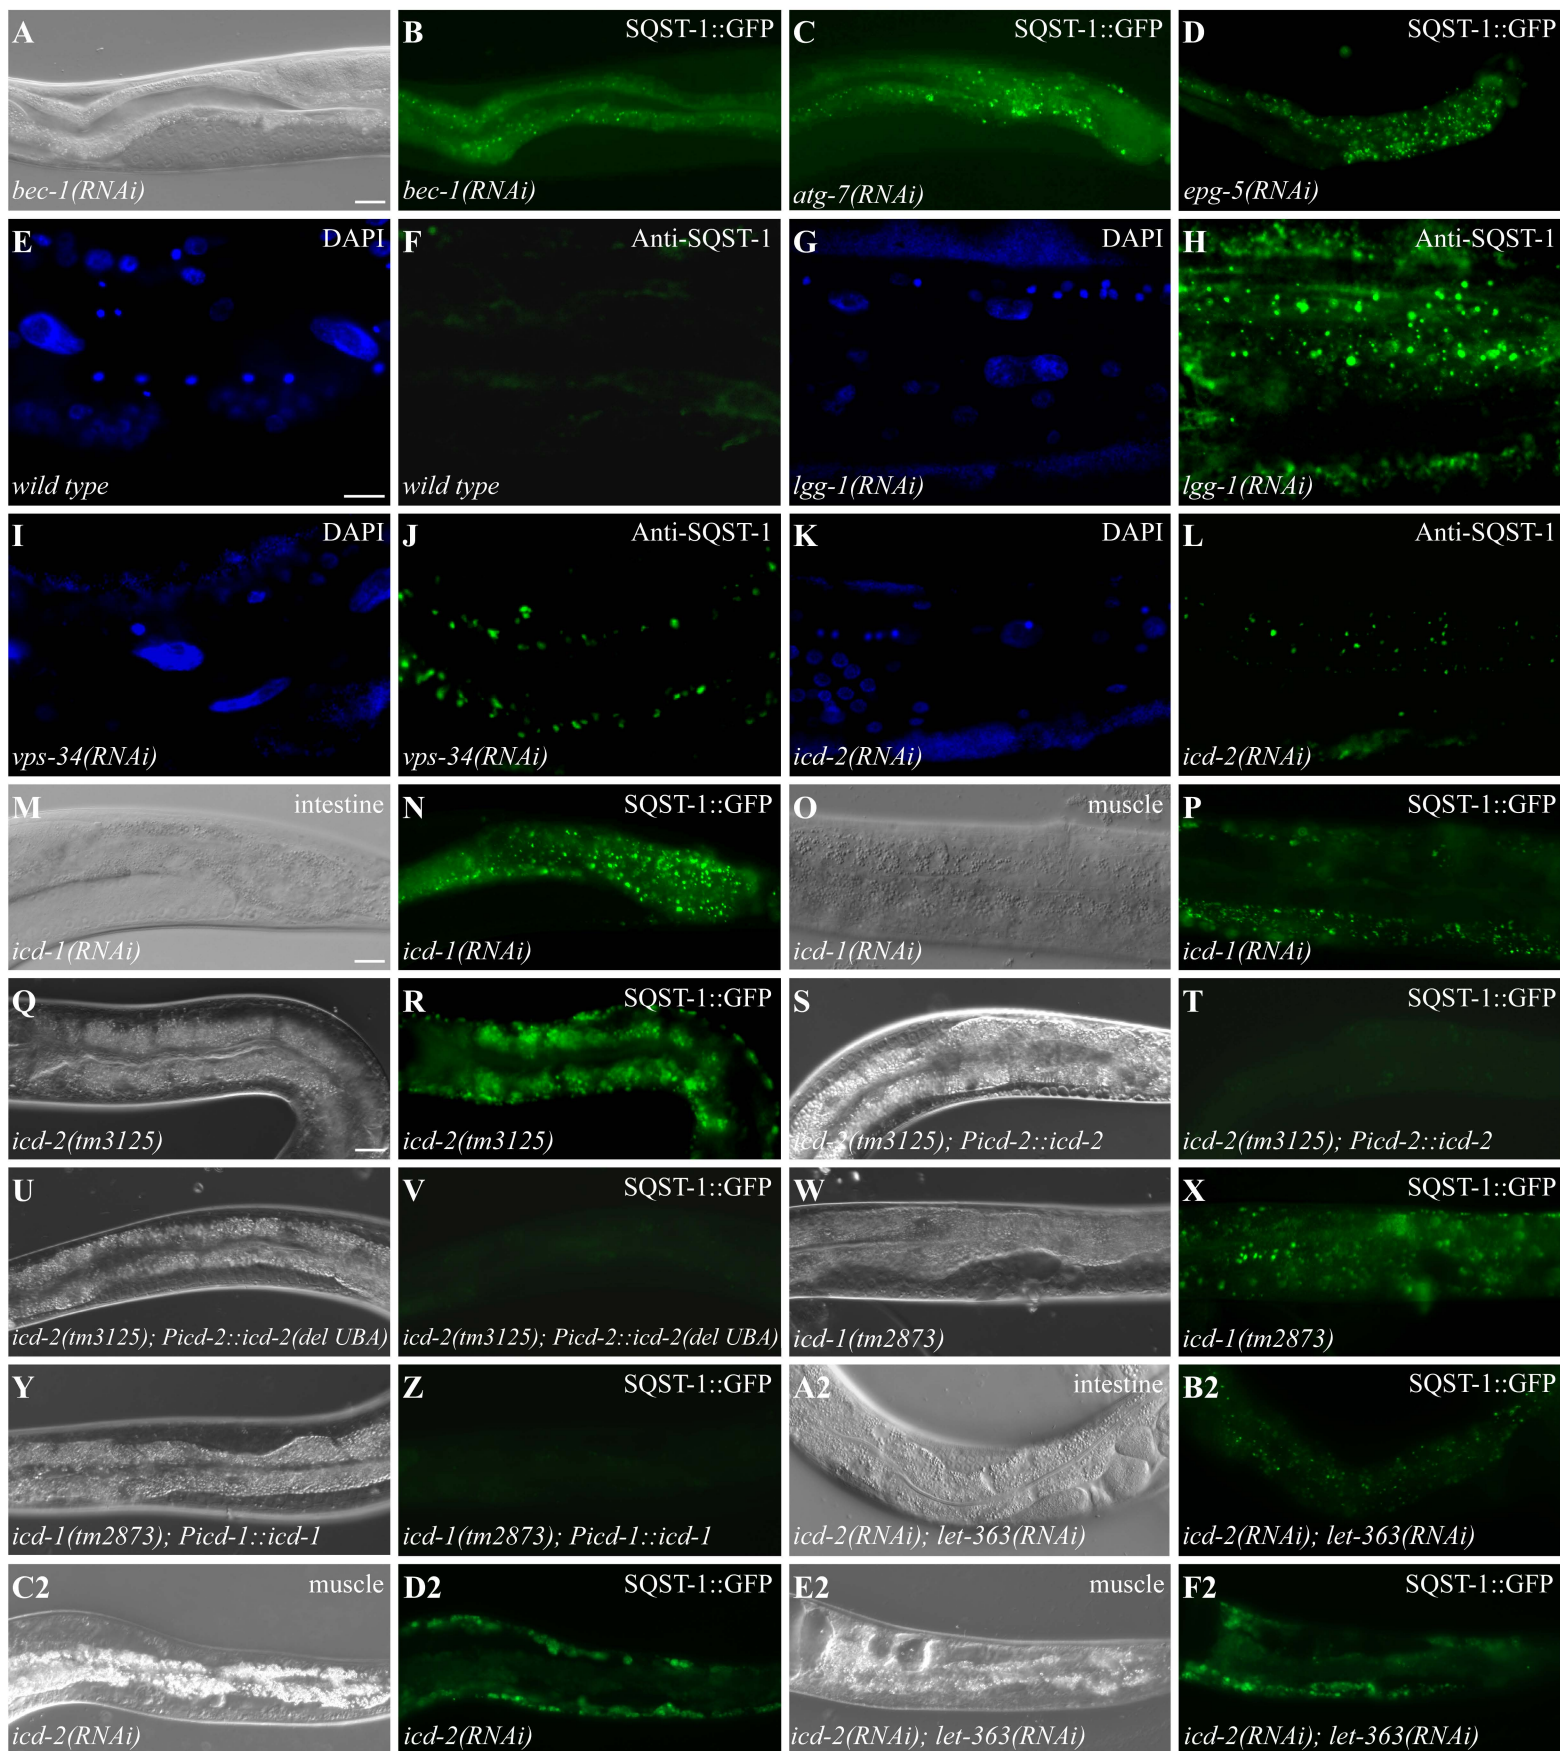

Figure S1

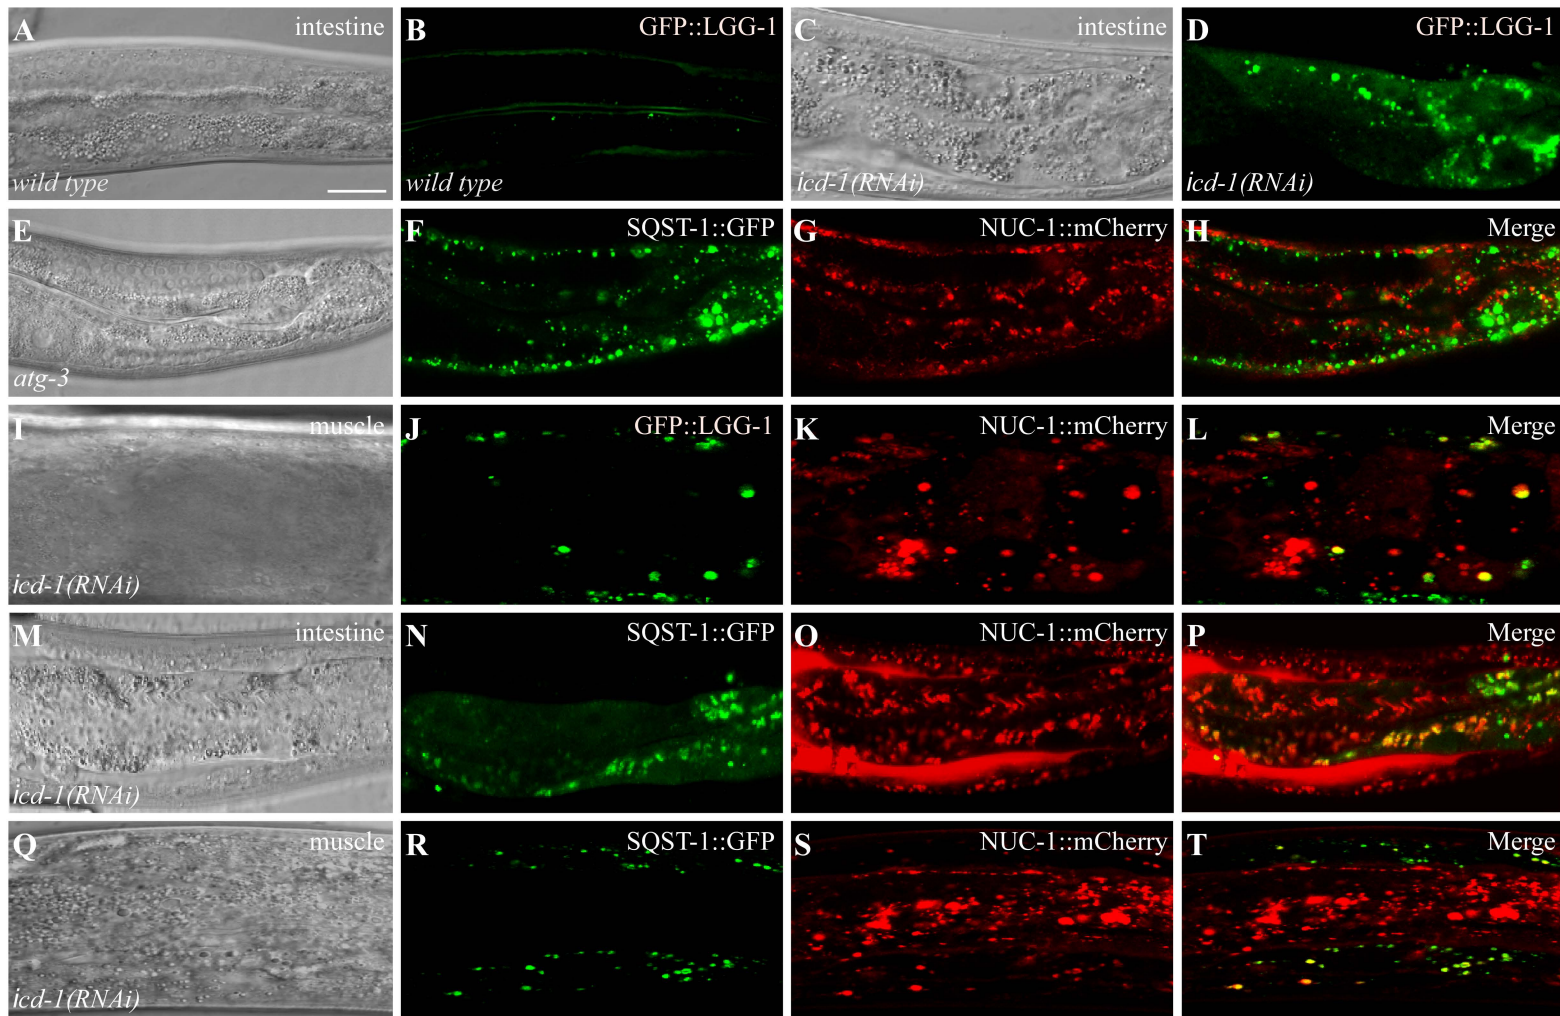

Figure S2



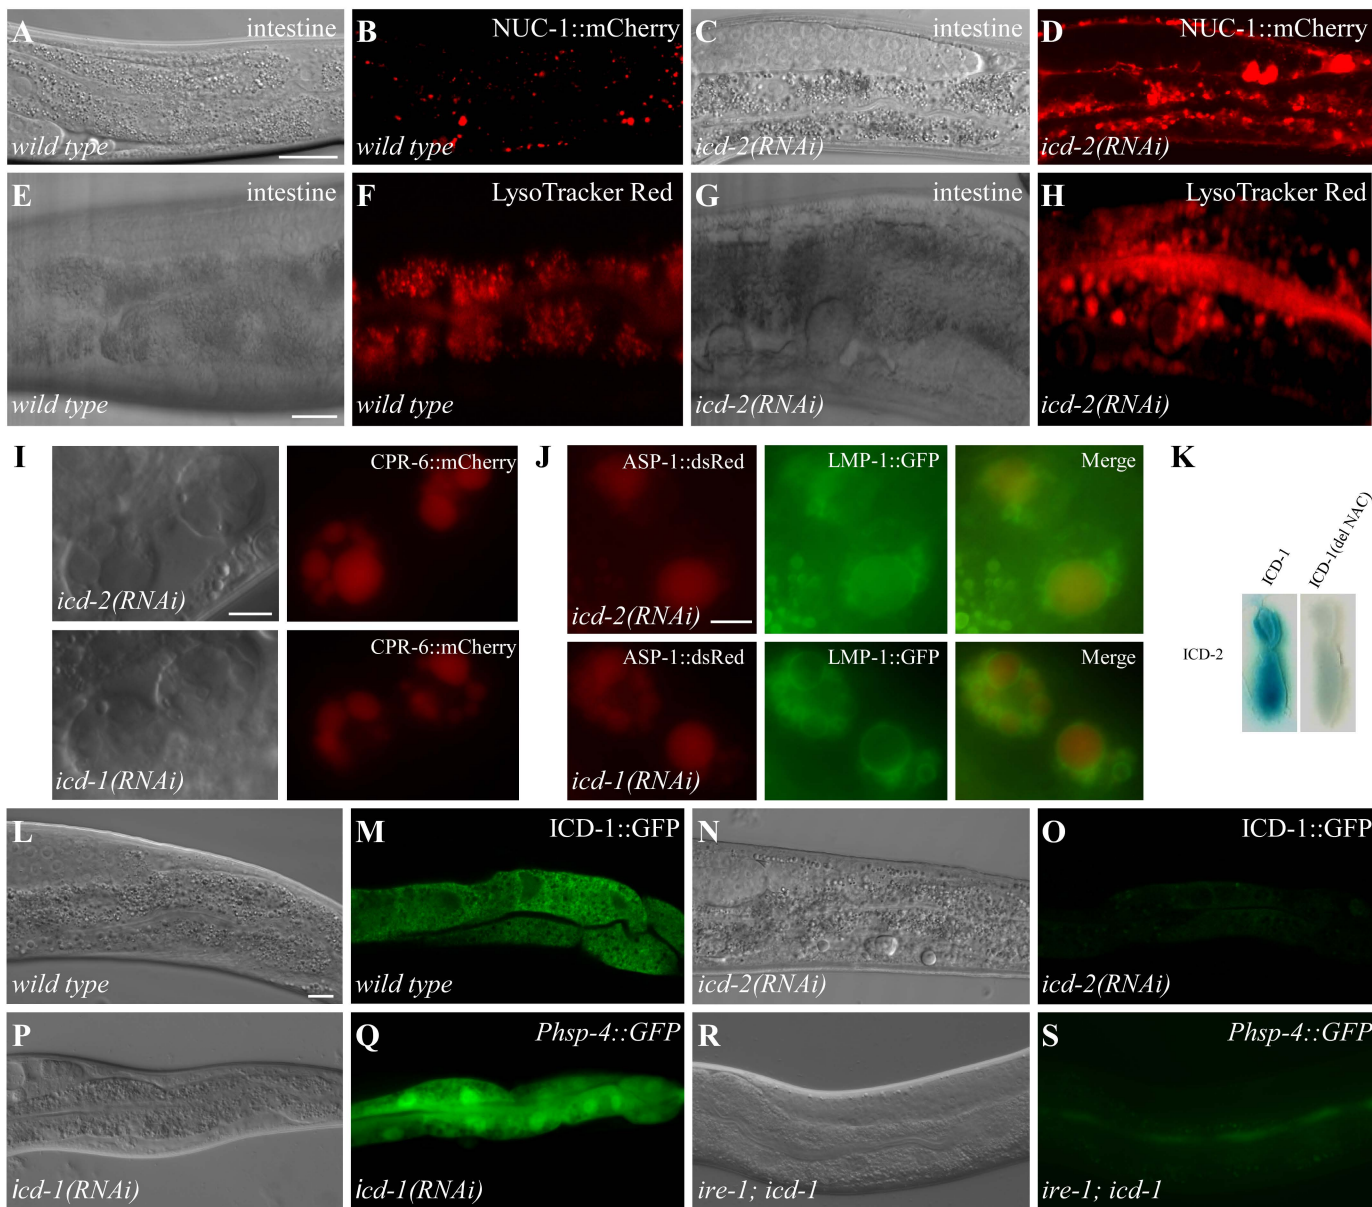

Figure S3

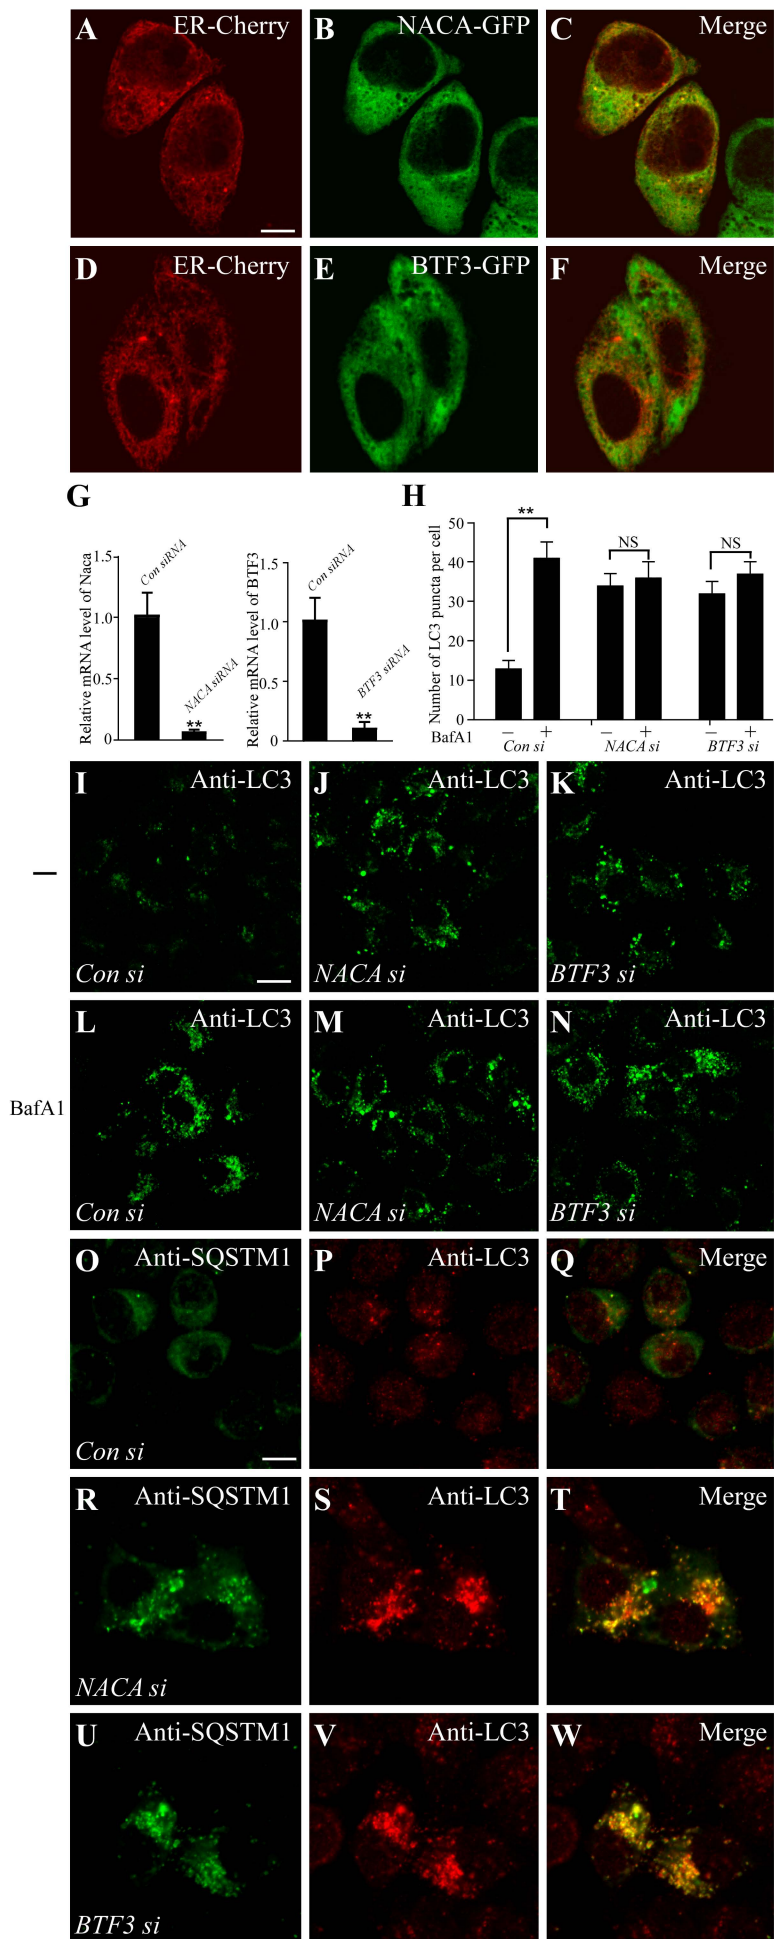

Figure S4

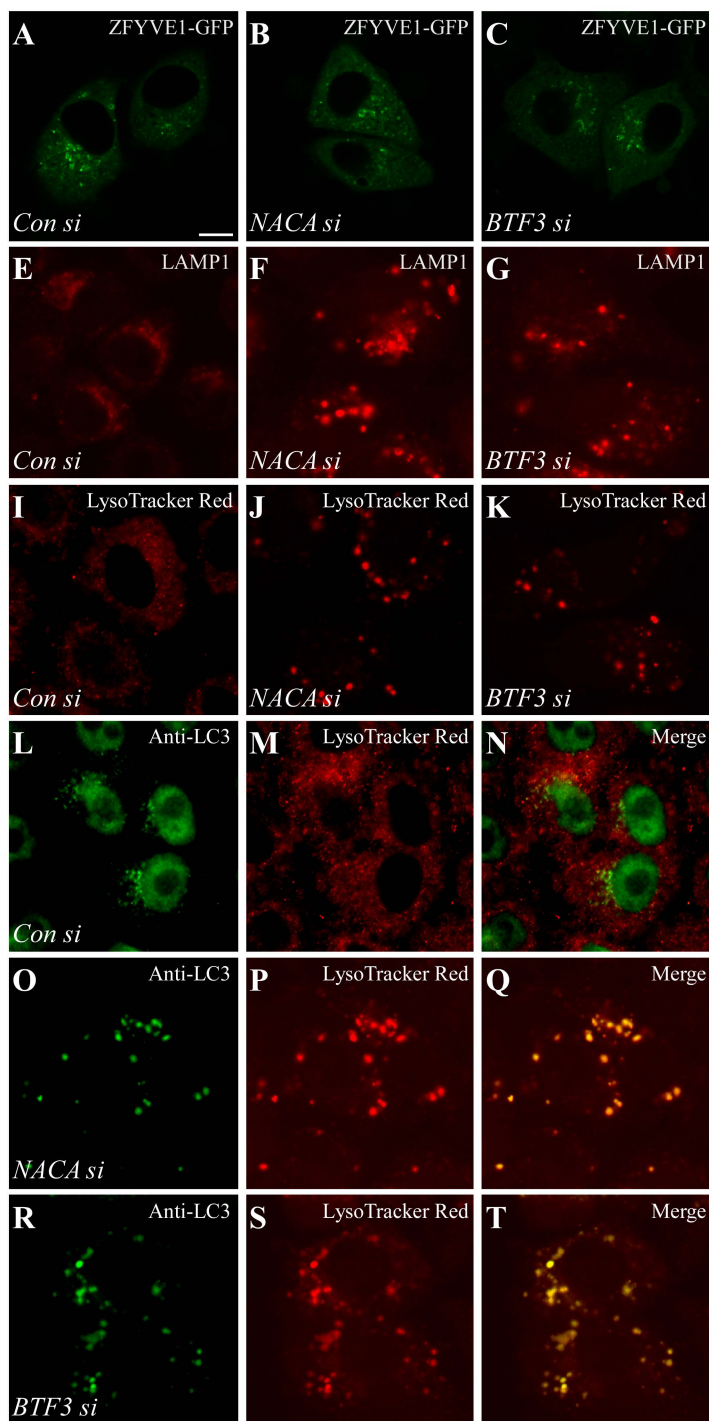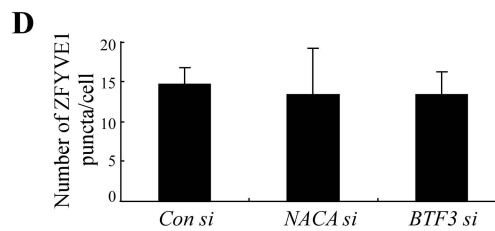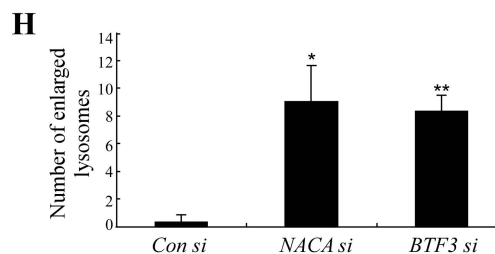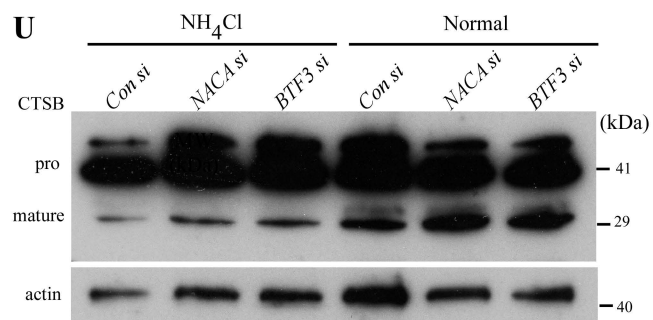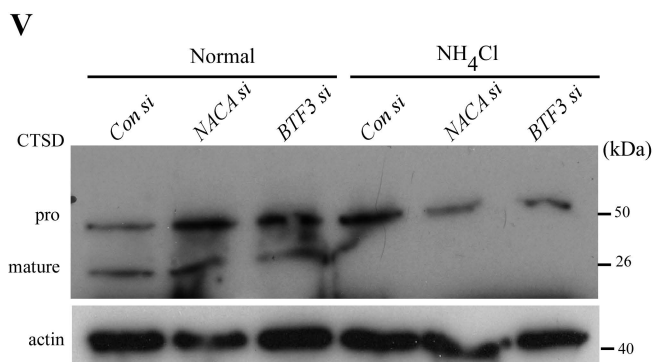

Figure S5

## Supplemental figure legends

**Figure S1.** Loss of function of *icd-2* and *icd-1* causes a defect in degradation of SQST-1 in *C. elegans*. (**A to D**) SQST-1::GFP accumulates into a large number of small spherical aggregates in the intestine in *bec-1(RNAi)* (**A and B**), *atg-7(RNAi)* (**C**) and *epg-5(RNAi)* (**D**) animals. (**E and F**) Endogenous SQST-1, detected by anti-SQST-1, is weakly expressed in intestine in wild-type animals. (**G to L**) Endogenous SQST-1 aggregates accumulate in the intestine in animals with RNAi inactivation of *lgg-1* (**G and H**), *vps-34* (**I and J**), *icd-2* (**K and L**). (**E**), (**G**), (**I**) and (**K**): DAPI images of the animals shown in (**F**), (**H**), (**J**) and (**L**), respectively. (**M and N**) SQST-1::GFP aggregates accumulate in the intestine in *icd-1(RNAi)* animals. (**O and P**) SQST-1::GFP aggregates accumulate in muscle cells in *icd-1(RNAi)* animals. (**Q to V**) *icd-2(tm3125)* mutants show accumulation of SQST-1::GFP aggregates in muscle and intestinal cells (**Q and R**). The defect is rescued by a transgene expressing ICD-2 (**S and T**) or by a transgene expressing mutant ICD-2 with a deletion of the UBA domain (**U and V**). (**W to Z**) Accumulation of SQST-1::GFP aggregates in *icd-1(tm2873)* mutants (**W and X**) is rescued by a transgene expressing *icd-1* (**Y and Z**). (**A2 and B2**) Accumulation of SQST-1::GFP aggregates in the intestine in *icd-2(RNAi)* animals is not suppressed by *let-363* inactivation. (**C2 to F2**) Accumulation of SQST-1::GFP aggregates in muscle cells in *icd-2(RNAi)* animals is not suppressed by inactivation of *let-363*. (**M**), (**O**), (**Q**), (**S**), (**U**), (**W**), (**Y**), (**A2**), (**C2**) and (**E2**): Nomarski images of the animals shown in (**N**), (**P**), (**R**), (**T**), (**V**), (**X**), (**Z**), (**B2**), (**D2**) and (**F2**), respectively. Scale bars: 20  $\mu$ m. Young adult animals were

examined.

**Figure S2.** SQST-1 aggregates and GFP::LGG-1 puncta in *icd-1(RNAi)* animals colocalize with NUC-1::mCherry-labeled lysosomes. (**A and B**) GFP::LGG-1 is weakly expressed in the intestine in a wild-type animal. (**C and D**) GFP::LGG-1 forms a large number of puncta in the intestine in *icd-1(RNAi)* animals. (**A**) and (**C**): Nomarski images of the animals shown in (**B**) and (**D**), respectively. (**E to H**) SQST-1::GFP aggregates in the intestine in *atg-3* mutants are separable from NUC-1::mCherry-labeled lysosomes. (**I to L**) GFP::LGG-1 puncta in muscle cells in *icd-1(RNAi)* animals colocalize with NUC-1::mCherry. (**M to T**) SQST-1-GFP aggregates in the intestine (**M to P**) and muscle cells (**Q to T**) colocalize with NUC-1::mCherry-labeled lysosomes. (**E**), (**I**), (**M**) and (**Q**): Nomarski images of the animals shown in the same row. Scale bars: 20  $\mu\text{m}$ . Young adult animals were examined.

**Figure S3.** Loss of function of NAC causes the accumulation of enlarged lysosomes. (**A to D**) Compared to wild-type intestine (**A and B**), NUC-1::mCherry-labeled lysosomal structures in the intestine are enlarged in *icd-2(RNAi)* animals (**C and D**). NUC-1::mCherry-labeled tubular lysosomes in the intestine are not obvious in young adult animals but become evident in older animals. (**E to H**) Compared to wild-type intestine (**E and F**), lysosomes stained by LysoTracker Red are enlarged in *icd-2(RNAi)* animals (**G and H**). (**I**) Enlarged lysosomes in coelomocytes in



*icd-2(RNAi)* and *icd-1(RNAi)* animals are labeled by CPR-6::mCherry. **(J)** ASP-1::dsRed labels the enlarged lysosomes, shown as LMP-1::GFP, in coelomocytes in *icd-2(RNAi)* and *icd-1(RNAi)* animals. **(K)** ICD-2 binds with ICD-1, but not with mutant ICD-1 with a deletion of the NAC domain, in a yeast two-hybrid analysis using an X-gal assay. **(L to O)** Compared to that in wild-type animals **(L and M)**, the expression level of ICD-1::GFP is dramatically decreased in *icd-2(RNAi)* animals **(N and O)**. **(P to S)** The elevated expression of *Phsp-4::GFP* in the intestine in *icd-1(RNAi)* animals **(P and Q)** is suppressed by simultaneous depletion of *ire-1* **(R and S)**. **(A), (C), (E), (G), (L), (N), (P) and (R)**: Nomarski images of the animals shown in **(B), (D), (F), (H), (M), (O), (Q) and (S)**, respectively. Scale bars: 20  $\mu\text{m}$  **(A to H, L to S)**, 5  $\mu\text{m}$  **(I and J)**. Young adult animals were examined in **(A to D)** and **(L to S)**. **(E to H)** show old adults. Animals in **(I and J)** were examined 24 h after the L4 stage.

**Figure S4.** Loss of function of NAC in mammalian cells causes a defect in the autophagy pathway. **(A to F)** NACA-GFP and BTF3-GFP colocalize with ER-Cherry in HeLa cells. **(G)** *NACA* and *BTF3* siRNA treatment greatly reduces levels of *NACA* and *BTF3* mRNA.  $**P < 0.01$ . **(H)** Number of endogenous LC3 puncta in control (Con) siRNA, *NACA* siRNA or *BTF3* siRNA-treated cells with (+) or without (-) BafA1 treatment. Fifty cells were counted.  $**P < 0.01$ . **(I to N)** Compared with Con siRNA-treated cells, the number of LC3 puncta, detected by anti-LC3, is increased in *NACA* and *BTF3* knockdown cells **(I to K)**, but is not further increased after BafA1

treatment (**L to N**). (**O to W**) Compared to control cells, SQSTM1 aggregates dramatically accumulate and largely colocalize with LC3 puncta in *NACA* siRNA and *BTF3* siRNA-treated cells. Scale bars: 10  $\mu$ m.

**Figure S5.** Loss of function of NAC causes accumulation of enlarged lysosomes. (**A to D**) Knockdown of *NACA* and *BTF3* does not affect the formation of ZFYVE1-GFP puncta. Numbers of ZFYVE1-GFP puncta are shown in (**D**). Thirty cells were counted. (**E to K**) Compared to control cells, lysosomes, labeled by LAMP1 (**E to G**) or detected by LysoTracker Red staining (**I to K**), are much larger in *NACA* and *BTF3* knockdown cells. (**H**) Numbers of enlarged lysosomes (with diameter larger than 1.5  $\mu$ m) in control, *NACA* and *BTF3* knockdown cells. Fifty cells were counted. \* $P < 0.05$ , \*\* $P < 0.01$ . (**L to T**) In *NACA* and *BTF3* knockdown cells, LC3 puncta, detected by anti-LC3, colocalize with enlarged lysosomes, detected by LysoTracker Red staining. (**U and V**) Maturation of CTSB and CTSD is not affected by *NACA* and *BTF3* knockdown.  $\text{NH}_4\text{Cl}$  treatment blocks maturation of CTSB and CTSD and thus serves as a positive control. Scale bars: 10  $\mu$ m.
